# Supplementary material for: Revision of the Late Jurassic crocodyliform Alligatorellus, and evidence for allopatric speciation driving high diversity in western European atoposaurids
Source: PeerJ. 2014 Sep 25;2:e599. doi: 10.7717/peerj.599 (PMC4179893; doi:10.7717/peerj.599)
Supplement: Data S1 — Measurements of Alligatorellus, Alligatorium and Atoposaurus, including PCA results. [file peerj-02-599-s001.xlsx]

## Sheet: Measurements
Species	Locality	Total length	Skull length	Skull width	Snout length	Orbit length	Orbit width	Supratemporal fenestra length	Supratemporal fenestra width	Intramandibular angle	Humerus length	Ulna length	Radius length	Femur length	Tibia length	Fibula length	Source	Specimen
Atoposaurus jourdani	France	168	20	15.6	8.3	8.6	5.8	3.4	0.8	35	11.2	9.9	9.5	16.7	15.7	13.9	Wellnhofer, 1971, pers. obv.	Holotype
Alligatorellus beaumonti	France	193.4	35.5	17.2	13.6	9.2	8	6.1	3.6	37	19.6	17.5	16.7	26.3	23.6	24.2	Wellnhofer, 1971, pers. obv.	Holotype
Alligatorium meyeri	France	NA	65.6	29	25.3	18	12.5	10.2	6.1	37	NA	29.9	28.9	42	39.1	40.6	Wellnhofer, 1971, pers. obv.	Holotype
Atoposaurus oberndorferi	Germany	130.4	26	13.1	8.6	9.1	5.6	NA	NA	35	15.6	13	13.1	17.7	18.3	15.8	Wellnhofer, 1971, pers. obv.	Holotype
Alligatorellus bavaricus	Germany	288	40.9	18.5	13.7	13.1	9.3	5.7	4	37	24.6	17	16.9	27.6	26.6	24.9	Wellnhofer, 1971, pers. obv.	Holotype
Alligatorium franconicum	Germany	NA	77	27.8	42.6	14.6	11	11.4	5.4	30	35	27.4	24	42.3	26.9	34.8	Wellnhofer, 1971	Holotype of A. paintenense

## Sheet: Ratios
Species	Locality	Skull length: skull width	Skull length: orbit length	Orbit length: orbit width	STF length: STF width	Orbit length: STF length	Humerus length: ulna length	Femur length: tibia length	Humerus length: femur length	Ulna length: tibia length
Atoposaurus jourdani	France	1.28205	2.32558	1.48276	4.25	2.52941	1.13131	1.06369	0.670659	0.630573
Alligatorellus beaumonti	France	2.06395	3.8587	1.15	1.69444	1.5082	1.12	1.11441	0.745247	0.741525
Alligatorium meyeri	France	2.26207	3.64444	1.44	1.67213	1.76471	NA	1.07417	NA	0.764706
Atoposaurus oberndorferi	Germany	1.98473	2.85714	1.625	NA	NA	1.2	0.967213	0.881356	0.710383
Alligatorellus bavaricus	Germany	2.21081	3.12214	1.4086	1.425	2.29825	1.44706	1.03759	0.891304	0.639098
Alligatorium franconicum	Germany	2.76978	5.27397	1.32727	2.11111	1.2807	1.27737	1.57249	0.827423	1.01859

## Sheet: PC scores
Taxon	PC-1	PC-2
Atoposaurus jourdani	1.14577	-0.00739724
Alligatorellus beaumonti	0.191673	0.0743949
Alligatorium meyeri	-1.13074	-0.192531
Atoposaurus oberndorferi	0.842895	0.0057084
Alligatorellus bavaricus	-0.0651192	-0.12001
Alligatorium franconicum	-0.984481	0.239835
