# Supplementary material for: Revision of the Late Jurassic crocodyliform Alligatorellus, and evidence for allopatric speciation driving high diversity in western European atoposaurids
Source: PeerJ. 2014 Sep 25;2:e599. doi: 10.7717/peerj.599 (PMC4179893; doi:10.7717/peerj.599)
Supplement: Table S1 — Measurements and vertebral counts of the type specimen of Alligatorellus bavaricus (LMU 1937 I 26). All measurements are given in millimetres. [file peerj-02-599-s002.xlsx]

## Sheet: Measurements
Aspect or element	Measurement
Total length	288
Skull length	40.9
Skull width	23
Orbit length	13.1
Orbit width	9.3
Supratemporal fenestra length	5.7
Supratemporal fenestra width	4
Intramandibular angle (degrees)	37
Maxillary teeth (number)	13
Tail length	174.5
Cervical vertebrae (number)	7
Dorsal vertebrae (number)	15
Sacral vertebrae (number)	3
Caudal vertebrae (number)	40
Scapula length	9.3
Ilium length	12
Pubis length	10.2
Ischium length	10.8
Humerus length	24.6
Ulna length	17
Radius length	16.9
Ulnare length	5
Radiale length	5
Femur length	27.6
Tibia length	26.6
Fibula length	24.9
MT I length	10
MT II length	13
MT III length	14.5
MT IV length	13
